# Supplementary material for: High-valence Ni3+ construction and stability by electrochemical de-lithiation boosting oxygen evolution
Source: Royal Society of Chemistry journal article supplement (doi:10.1039/d3qm00633f), 2023-01-01
Supplement: d3qm00633f1.pdf [file d3qm00633f1.pdf]

## Supporting Information

### **High-valence Ni<sup>3+</sup> construction and stability by electrochemical de-lithiation boosting oxygen evolution**

Shujing Li<sup>1,2#</sup>, Xiaoming Zhu<sup>3#</sup>, Xiaohan Wang<sup>1</sup>, Wenshu Luo<sup>2</sup>, Xu Yu<sup>2</sup>, Qiuyun Guo<sup>1</sup>, Kunming Song<sup>1</sup>, Han Tian<sup>2\*</sup>, Xiangzhi Cui<sup>1,2\*</sup>, Jianlin Shi<sup>2</sup>

<sup>1</sup>School of Chemistry and Materials Science, Hangzhou Institute for Advanced Study, University of Chinese Academy of Sciences, Hangzhou 310024, P.R. China

<sup>2</sup>Shanghai Institute of Ceramics, Chinese Academy of Sciences, Shanghai 200050, P.R. China

<sup>3</sup>College of Mechanical and Vehicle Engineering, Hunan University, Changsha 410082, P.R. China

\* Correspondence to: [cuixz@mail.sic.ac.cn](mailto:cuixz@mail.sic.ac.cn); [tianhan@mail.sic.ac.cn](mailto:tianhan@mail.sic.ac.cn)

### Supplementary Figures

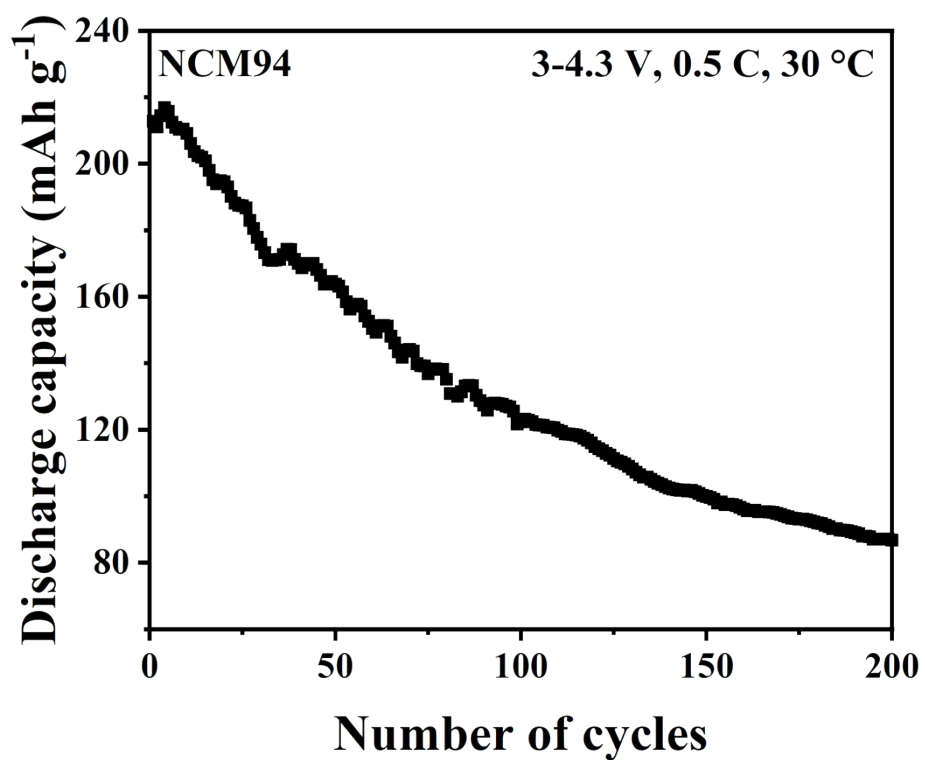

**Fig. S1** Charging and discharging cycle curve of NCM94.

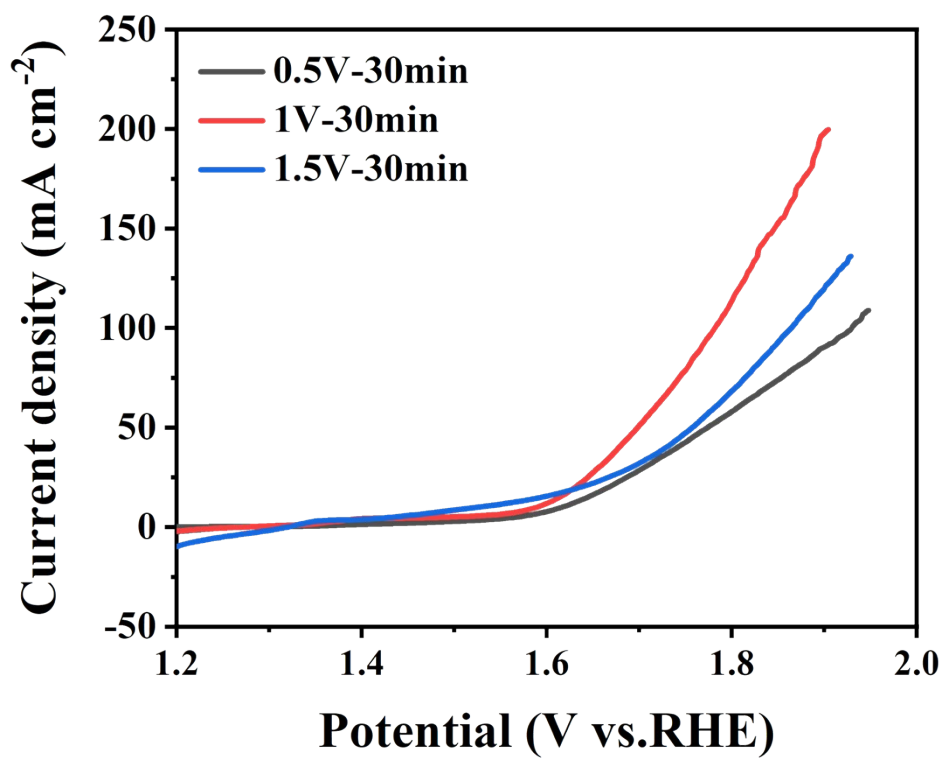

**Fig. S2** LSV curves of de-NCM94 after different electrochemical de-lithiation voltages.

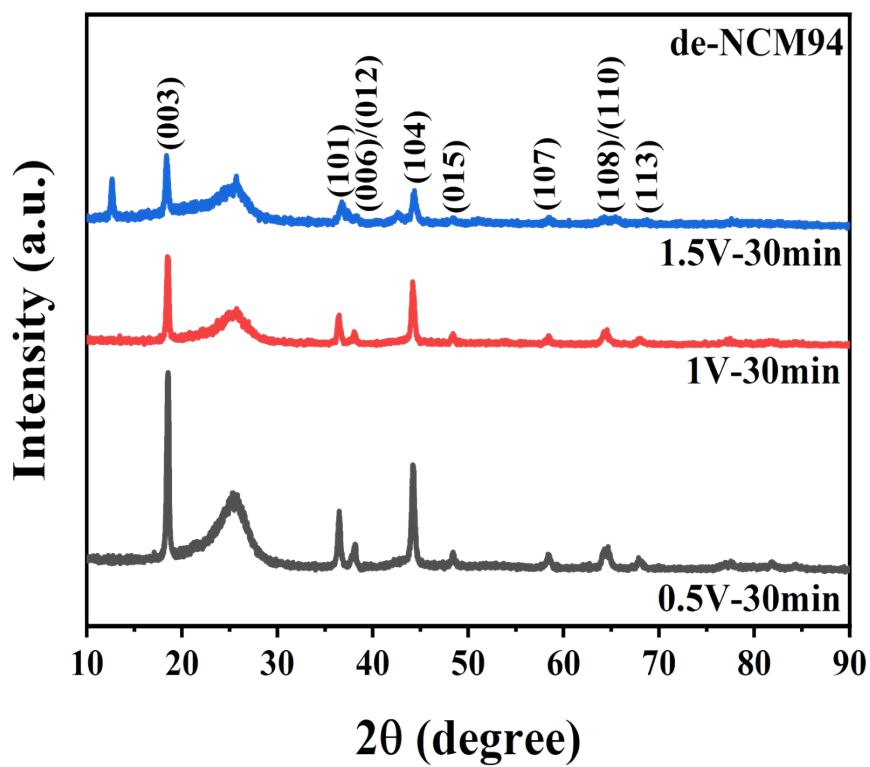

**Fig. S3** XRD patterns of de-NCM94 after different electrochemical de-lithiation voltages.

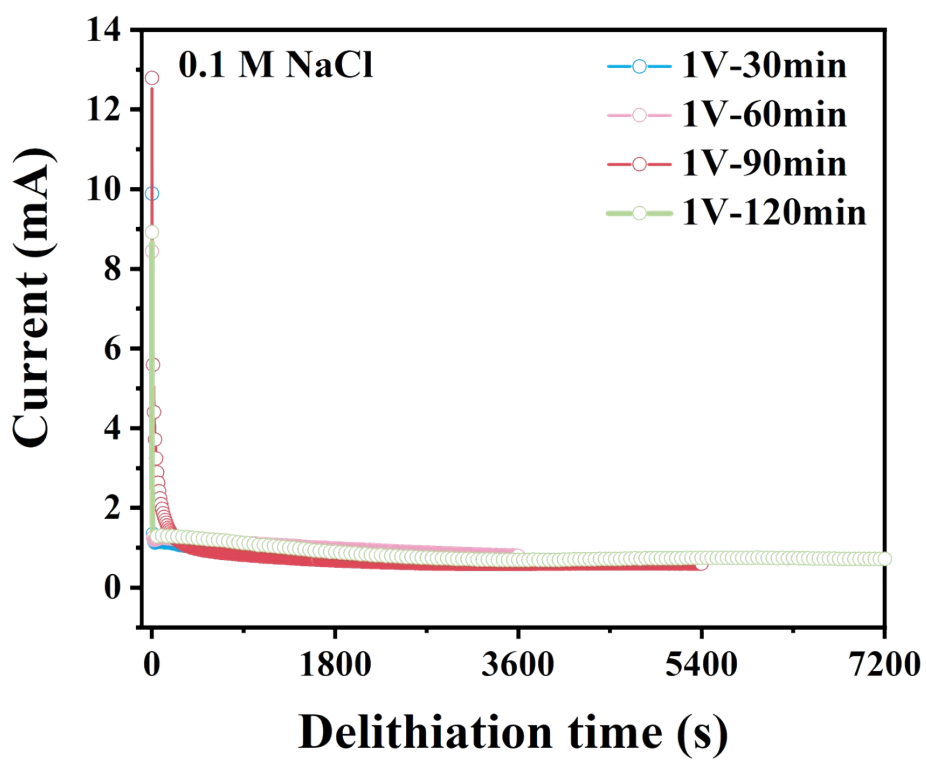

**Fig. S4** i-t curves of de-NCM94 de-lithiated at 1 V for different times (30 min, 60 min, 90 min and 120 min).

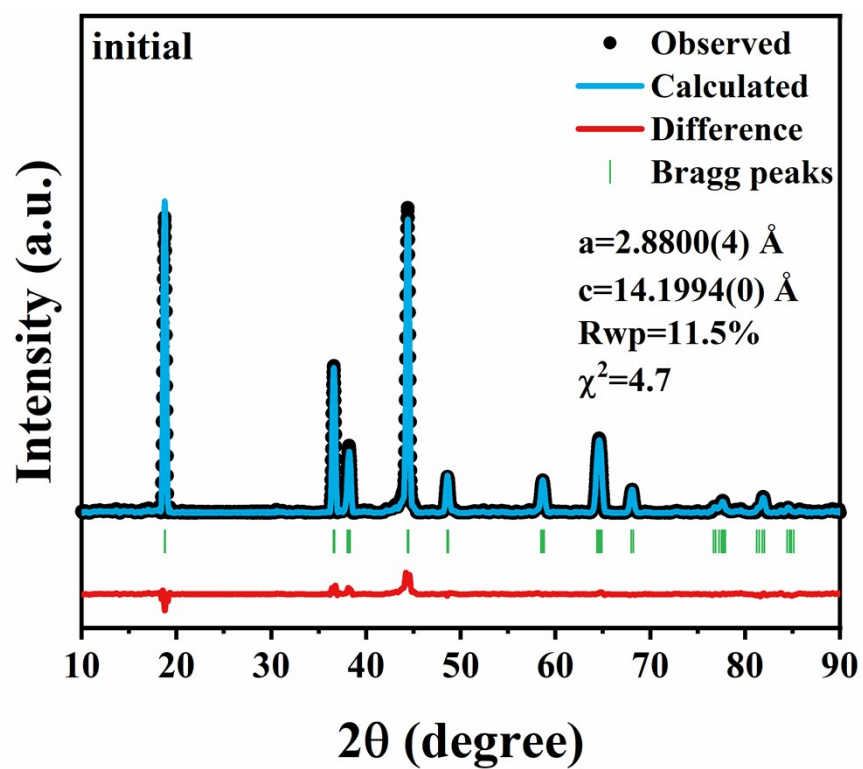

Fig. S5 Rietveld refinement results of NCM94-initial.

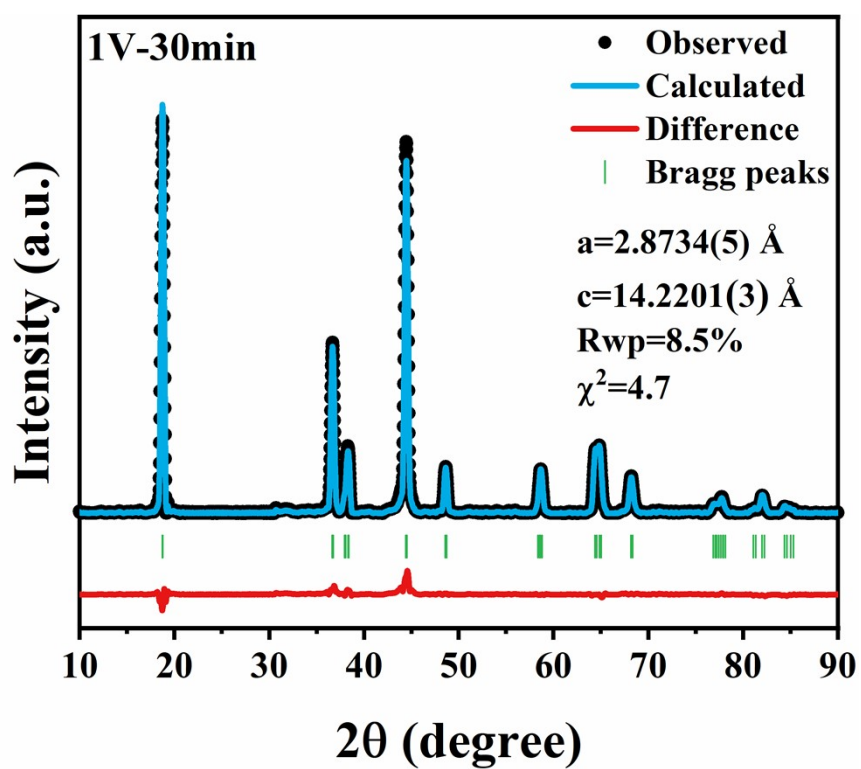

Fig. S6 Rietveld refinement results of NCM94-1V-30min.

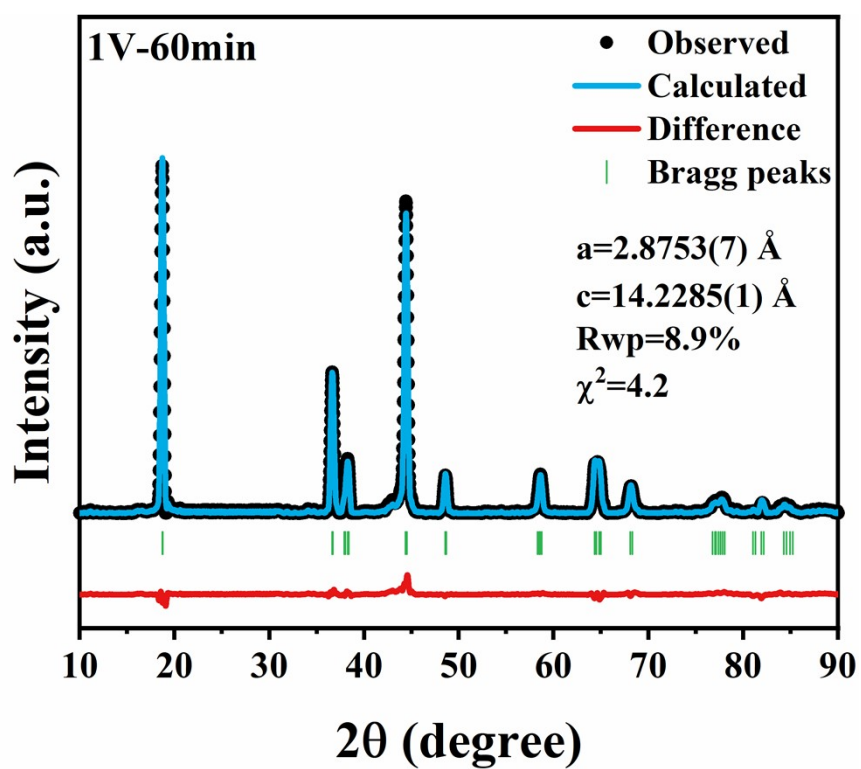

Fig. S7 Rietveld refinement results of NCM94-1V-60min.



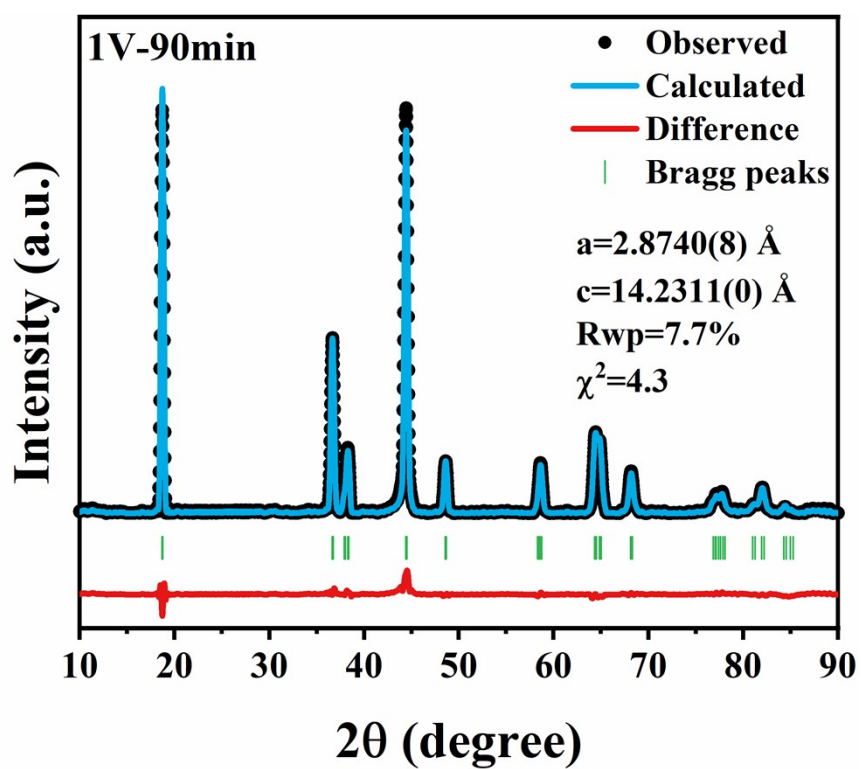

Fig. S8 Rietveld refinement results of NCM94-1V-90min.

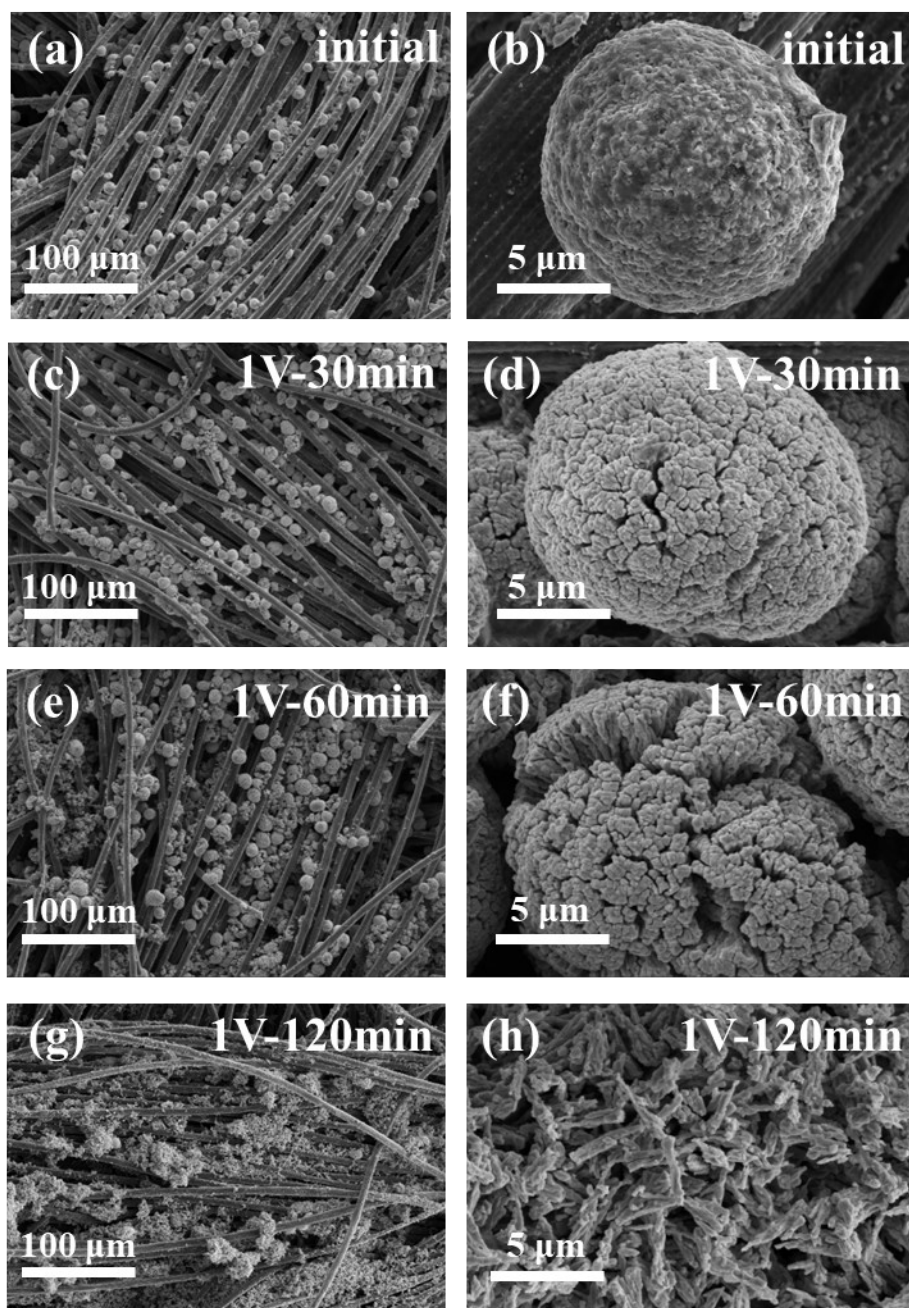

**Fig. S9** SEM images of de-NCM94 at different magnifications after varied electrochemical de-lithiation time.

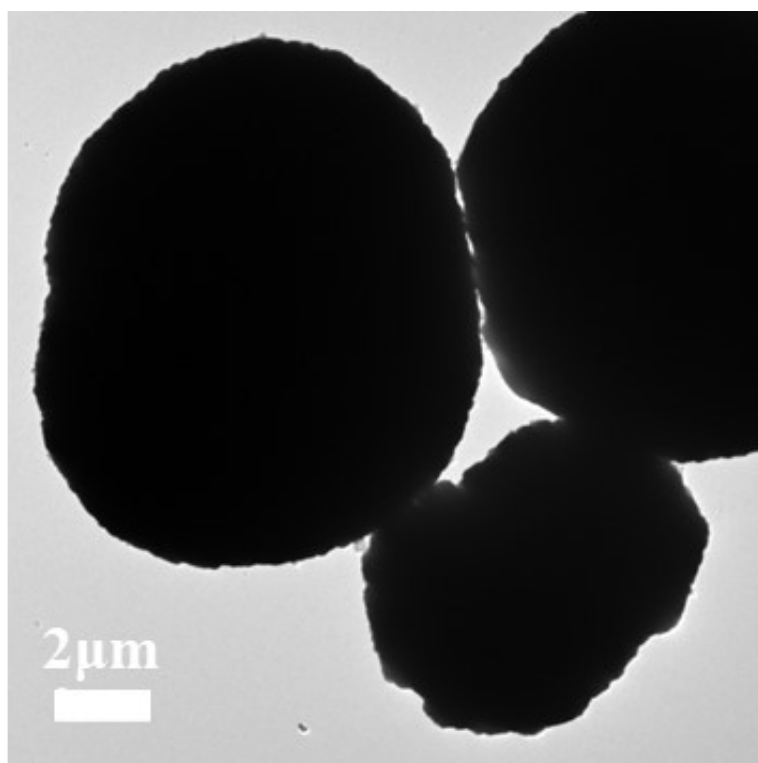

**Fig. S10** TEM image of initial NCM94.

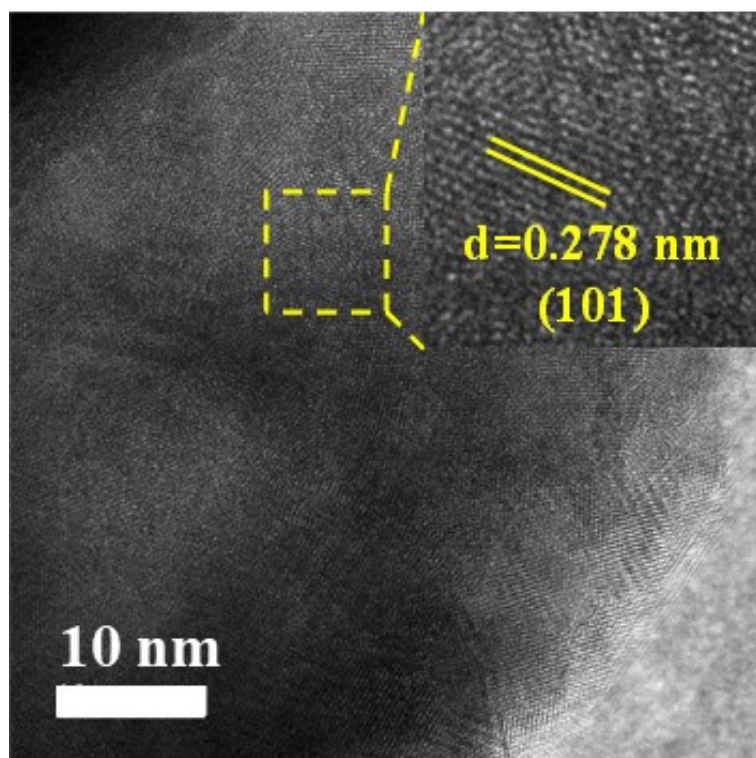

**Fig. S11** HRTEM image of initial NCM94.

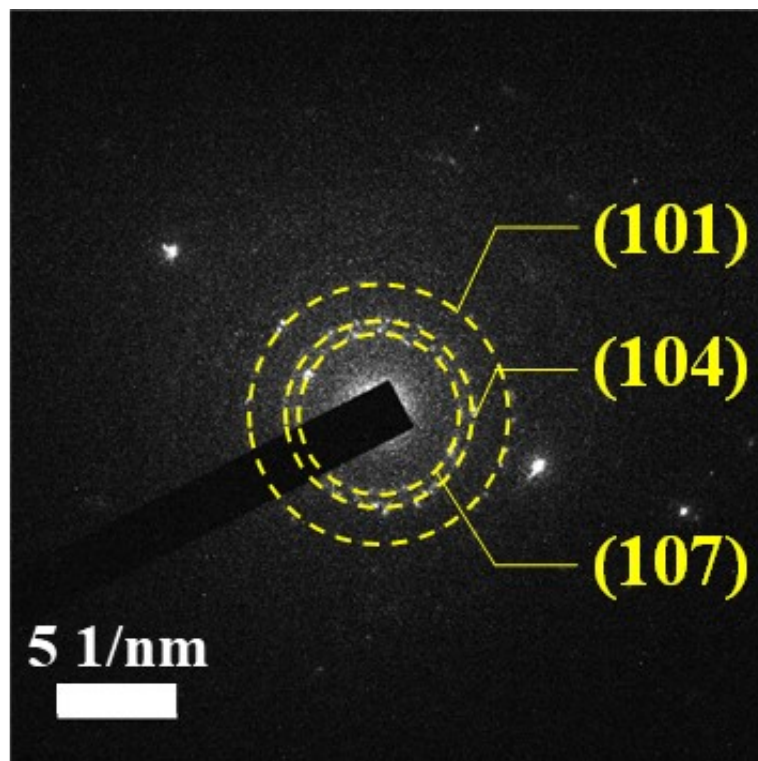

**Fig. S12** SAED image of initial NCM94.

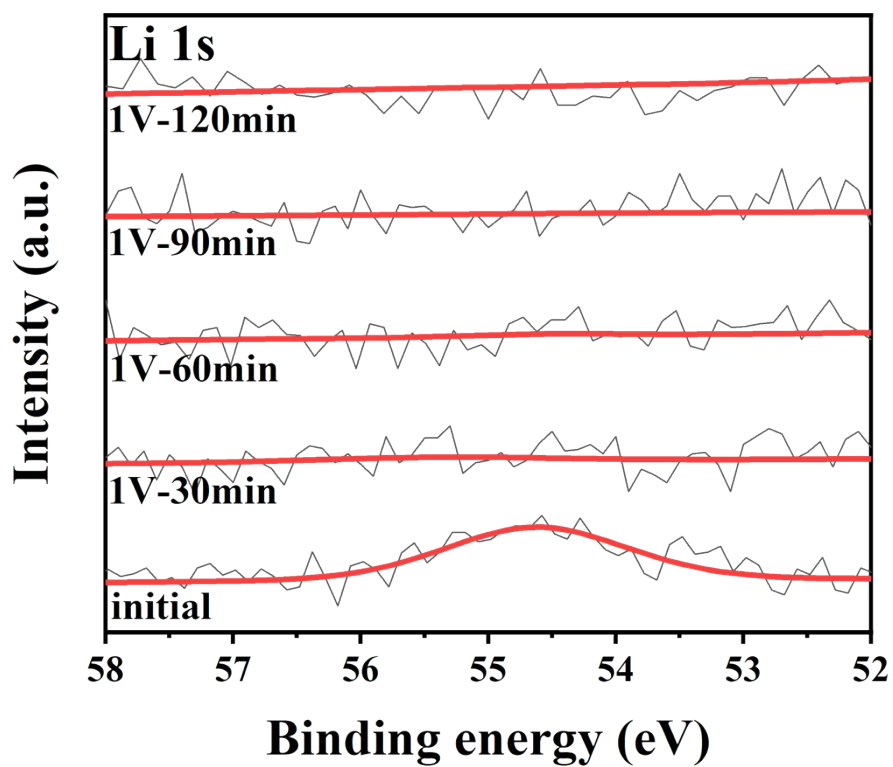

**Fig. S13** Li 1s XPS spectra of de-NCM94 after varied electrochemical de-lithiation time.

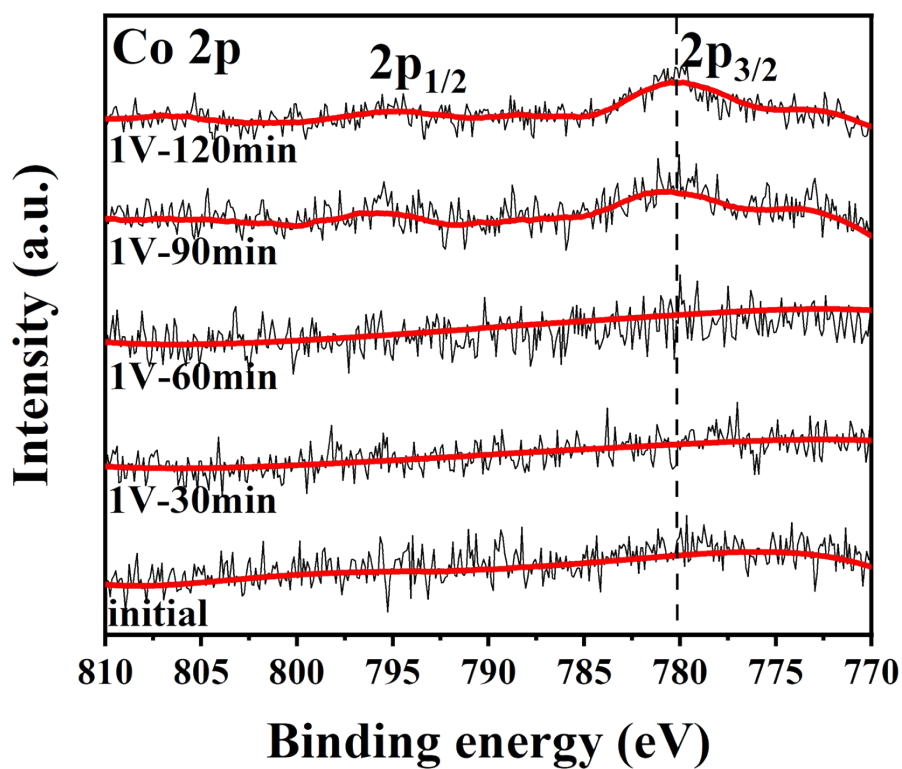

**Fig. S14** Co 2p XPS spectra of de-NCM94 after varied electrochemical de-lithiation time.

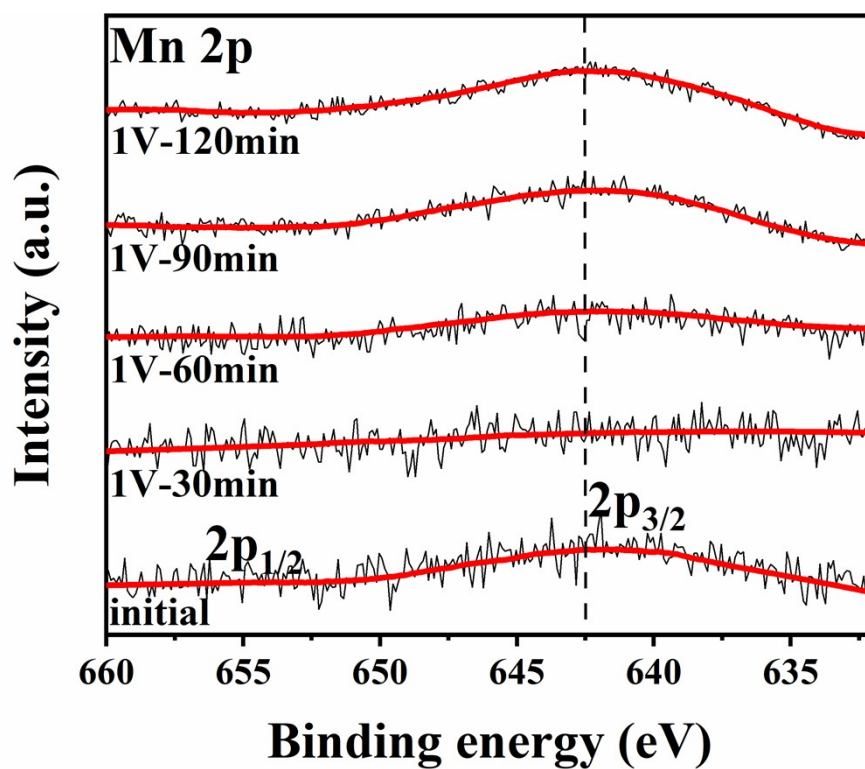

Fig. S15 Mn 2p XPS spectra of de-NCM94 after varied electrochemical de-lithiation time.



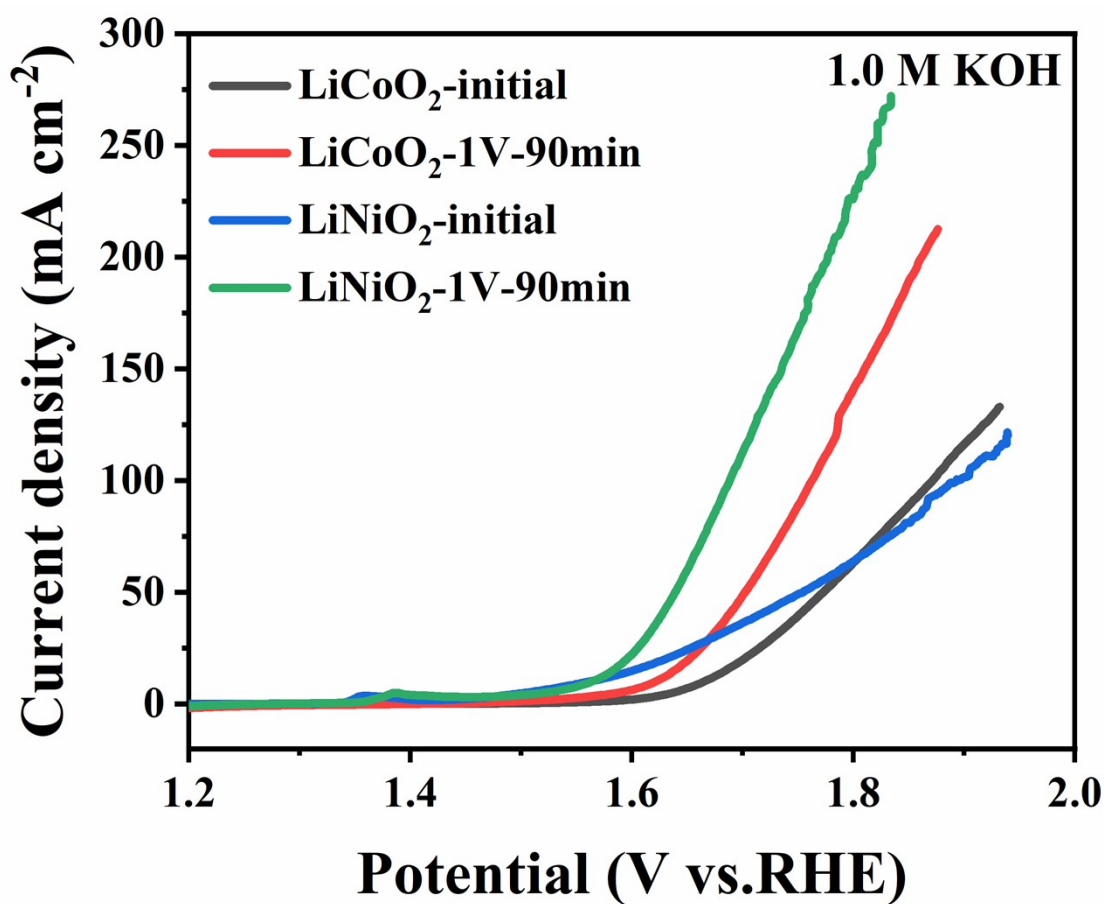

Fig. S16 LSV curves of LiCoO<sub>2</sub> and LiNiO<sub>2</sub> before and after electrochemical delithiation.

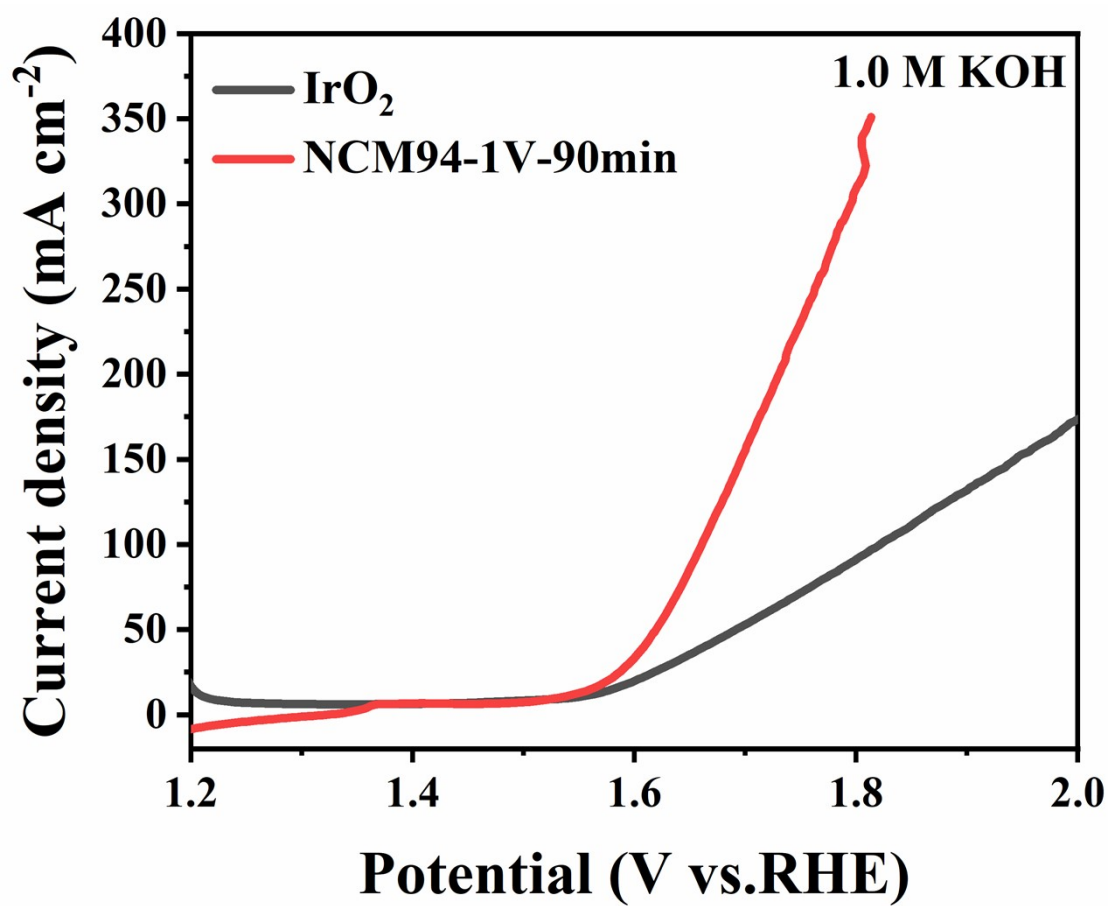

Fig. S17 LSV curves of NCM94-1V-90min and commercial IrO<sub>2</sub>.

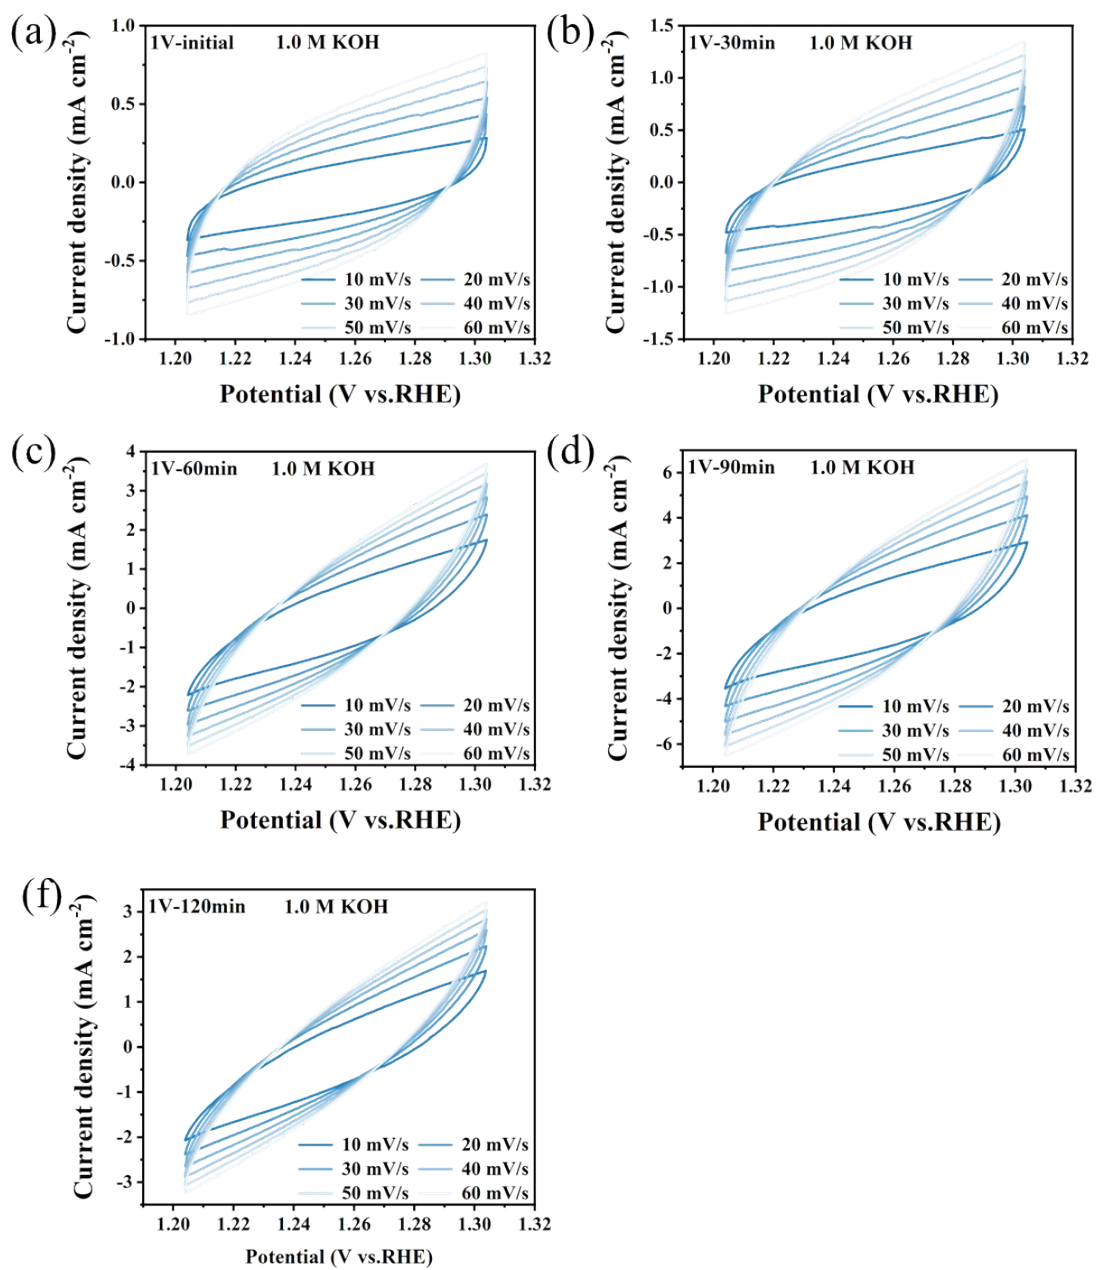

**Fig. S18** CV curves of de-NCM94 after varied electrochemical de-lithiation times.

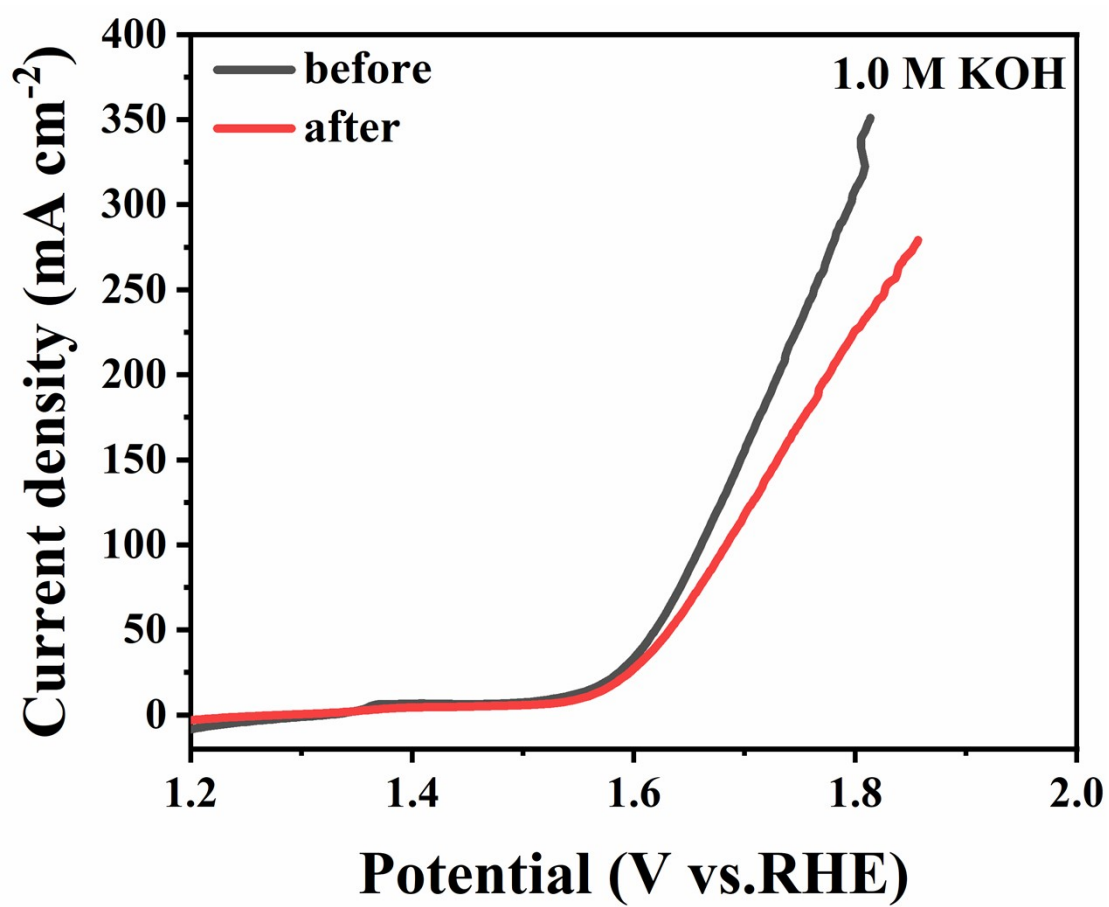

Fig. S19 LSV curves of NCM94-1V-90min before and after stability testing of 300 h.

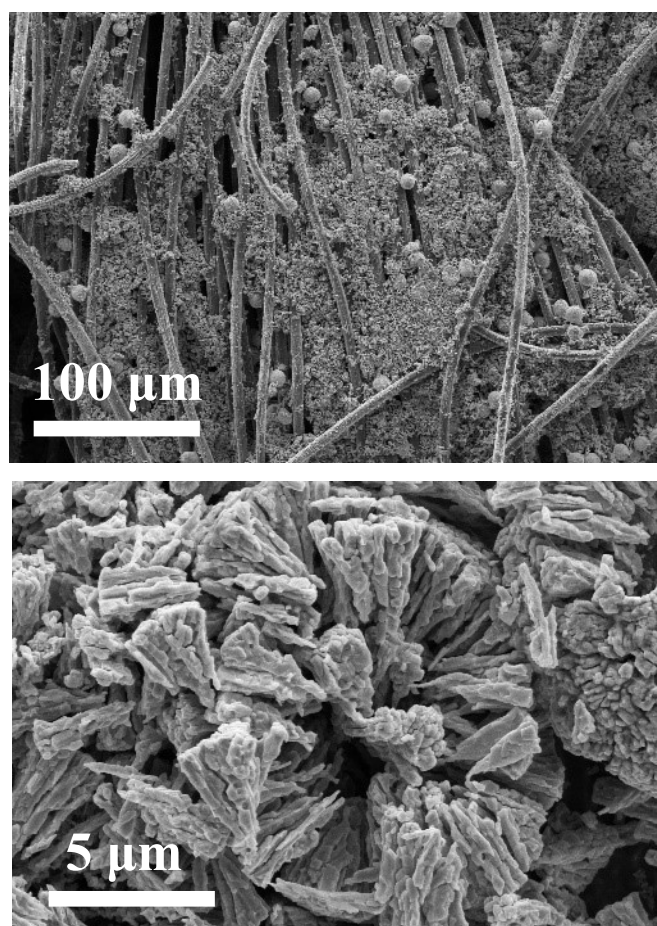

**Fig. S20** SEM images of NCM94-1V-90min after stability testing.

## Supplementary Tables

**Table 1.** Rietveld refinement results of de-NCM after varied de-lithiation time.

| samples   | a=b (Å)   | c (Å)      |
|-----------|-----------|------------|
| Initial   | 2.8800(4) | 14.1994(0) |
| 1V-30min  | 2.8774(5) | 14.2201(3) |
| 1V-60min  | 2.8753(7) | 14.2285(1) |
| 1V-90min  | 2.8740(8) | 14.2311(0) |
| 1V-120min | -         | -          |

**Table 2.** ICP-MS result of electrolyte after 90 min of electrochemical de-lithiation under 1 V.

|               | Li            | Ni             | Co            | Mn            | de-lithiation degree |
|---------------|---------------|----------------|---------------|---------------|----------------------|
| concentration | 2.31<br>μg/mL | 24.15<br>ng/mL | 0.18<br>ng/mL | <0.1<br>ng/mL | 38%                  |

**Table 3.** Comparison of overpotential of recycling spent LIBs cathode materials for OER electrocatalysts at 10 mA cm<sup>-2</sup>.

| spent lithium-ion battery materials                                       | OER catalysts                                                           | recycling method                   | overpotential (at 10 mA cm <sup>-2</sup> ) | reference        |
|---------------------------------------------------------------------------|-------------------------------------------------------------------------|------------------------------------|--------------------------------------------|------------------|
| <b>LiNi<sub>0.94</sub>Co<sub>0.05</sub>Mn<sub>0.01</sub>O<sub>2</sub></b> | <b>de-NCM94</b>                                                         | <b>electrochemical de-lithium</b>  | <b>270 mV</b>                              | <b>This work</b> |
| LiNi <sub>0.5</sub> Co <sub>0.2</sub> Mn <sub>0.3</sub> O <sub>2</sub>    | NiCoMnB                                                                 | boriding process                   | 271 mV                                     | 1                |
| LiNi <sub>0.8</sub> Co <sub>0.1</sub> Mn <sub>0.1</sub> O <sub>2</sub>    | NiCoMnB                                                                 | boriding process                   | 263 mV                                     | 1                |
| LiFePO <sub>4</sub>                                                       | Ni-LiFePO <sub>4</sub>                                                  | electrochemical transformation     | 285 mV                                     | 2                |
| Spent LIBs                                                                | MnCo <sub>2</sub> O <sub>4</sub>                                        | chemical leaching, calcination     | 400 mV                                     | 3                |
| LiNi <sub>0.5</sub> Mn <sub>0.3</sub> Co <sub>0.2</sub> O <sub>2</sub>    | NiMnCo-AC                                                               | thermal radiation                  | 340 mV                                     | 4                |
| LiCoO <sub>2</sub>                                                        | CP4(LiCoO <sub>2</sub> )                                                | calcination                        | 550 mV                                     | 5                |
| LiNi <sub>0.5</sub> Mn <sub>0.3</sub> Co <sub>0.2</sub> O <sub>2</sub>    | Ni <sub>0.5</sub> Mn <sub>0.3</sub> Co <sub>0.2</sub> (OH) <sub>2</sub> | mechanochemical activation process | 280 mV                                     | 6                |
| LiCoO <sub>2</sub>                                                        | CoN-graphene                                                            | calcination, hydrothermal          | 280 mV                                     | 7                |



## References

1. Z. Chen, W. Zou, R. Zheng, W. Wei, W. Wei, B. J. Ni and H. Chen, Synergistic recycling and conversion of spent Li-ion battery leachate into highly efficient oxygen evolution catalysts, *Green Chem.*, 2021, **23**, 6538-6547.
2. Y. Shen, Recycling cathode materials of spent lithium-ion batteries for advanced catalysts production, *J. Power Sources*, 2022, **528**, 231220.
3. S. Natarajan, S. Anantharaj, R. J. Tayade, H. C. Bajaj and S. Kundu, Recovered spinel  $\text{MnCo}_2\text{O}_4$  from spent lithium-ion batteries for enhanced electrocatalytic oxygen evolution in alkaline medium, *Dalton Trans.*, 2017, **46**, 14382-14392.
4. M. Jiao, Q. Zhang, C. Ye, Z. Liu, X. Zhong, J. Wang, C. Li, L. Dai, G. Zhou and H. M. Cheng, Recycling spent  $\text{LiNi}_{1-x-y}\text{Mn}_x\text{Co}_y\text{O}_2$  cathodes to bifunctional NiMnCo catalysts for zinc-air batteries, *Proc. Natl. Acad. Sci. U S A*, 2022, **119**, 2202202119.
5. A. Arif, M. Xu, J. Rashid, C. S. Saraj, W. Li, B. Akram and B. Hu, Efficient Recovery of Lithium Cobaltate from Spent Lithium-Ion Batteries for Oxygen Evolution Reaction, *Nanomaterials (Basel)*, 2021, **11**, 3343.
6. Y. Yang, H. Yang, H. Cao, Z. Wang, C. Liu, Y. Sun, H. Zhao, Y. Zhang and Z. Sun, Direct preparation of efficient catalyst for oxygen evolution reaction and high-purity  $\text{Li}_2\text{CO}_3$  from spent  $\text{LiNi}_{0.5}\text{Mn}_{0.3}\text{Co}_{0.2}\text{O}_2$  batteries, *J. Clean. Prod.*, 2019, **236**, 117576.
7. Z. Lu, G. Chen, Y. Li, H. Wang, J. Xie, L. Liao, C. Liu, Y. Liu, T. Wu, Y. Li, A. C. Luntz, M. Bajdich and Y. Cui, Identifying the Active Surfaces of Electrochemically Tuned  $\text{LiCoO}_2$  for Oxygen Evolution Reaction, *J. Am. Chem. Soc.*, 2017, **139**, 6270-6276.
